# Supplementary material
Source: Springer Nature journal article supplement (https://www.springermedizin.de/resource/supplementary/12985_2010_840_MOESM6_ESM.pdf/9609314)

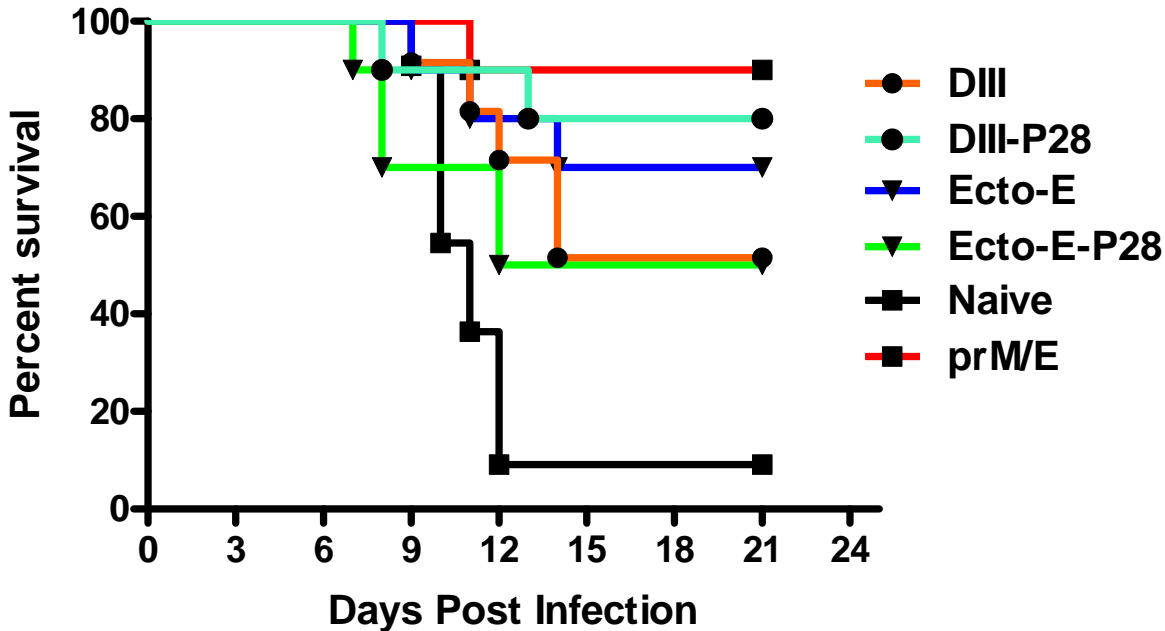

Supplement: MOESM6 [file 9609314]
